# Supplementary material for: Rational design of 1D NiMoO4/0D CdS heterostructures for efficient photocatalytic hydrogen generation under visible light
Source: Royal Society of Chemistry journal article supplement (doi:10.1039/d2se00705c), 2022-01-01
Supplement: d2se00705c1.pdf [file d2se00705c1.pdf]

## *Supporting Information*

### **Rational engineering of 1D NiMoO<sub>4</sub>/0D CdS heterostructure for efficient photocatalytic hydrogen generation under visible light**

**Mohamed AbdEl-Aal<sup>1†</sup>, Mahmoud R. Saleh<sup>2†\*</sup>, Haitham M. El-Bery<sup>2\*</sup>**

<sup>1</sup>Chemistry Department, Faculty of Science, Assiut University, Assiut 71515, Egypt.

<sup>2</sup>Advanced Multifunctional Materials Laboratory, Chemistry Department, Faculty of Science, Assiut University, Assiut 71515, Egypt.

**\*Corresponding Author Email: [Haitham.El-Bery@aun.edu.eg](mailto:Haitham.El-Bery@aun.edu.eg)**

**†These authors are equally contributed**

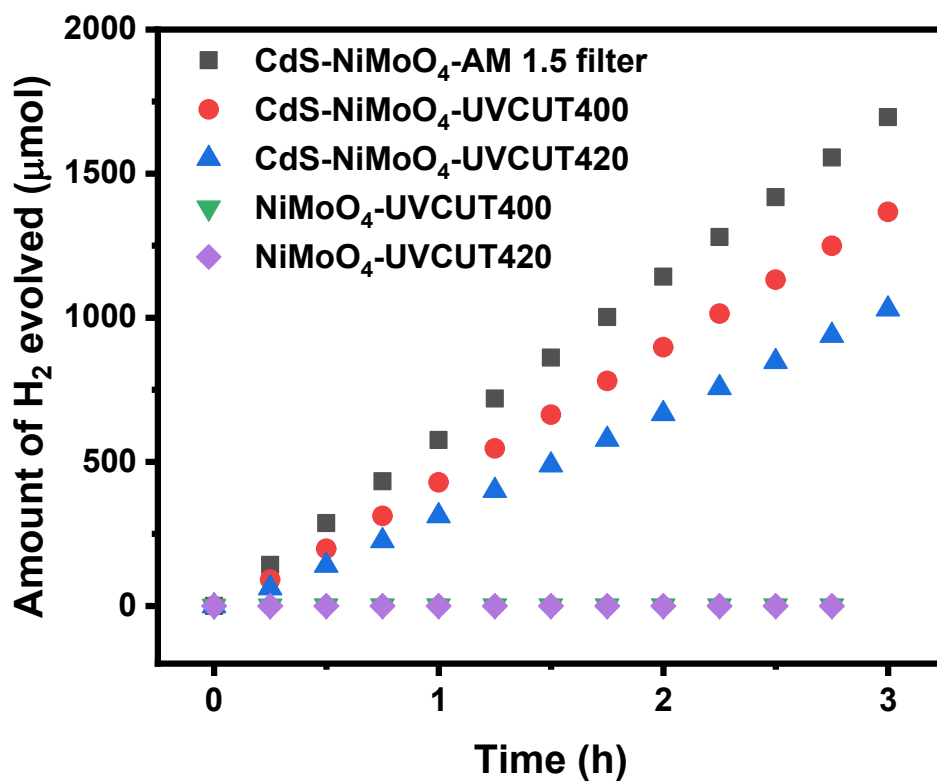

**Fig. S1.** Time course of H<sub>2</sub> evolution over CdS-NiMoO<sub>4</sub> and NiMoO<sub>4</sub> composites using different Xe filters of AM 1.4, UVCUT400, and UVCUT420. (Reaction conditions: 100 mg of sample, pH~12.6, and reaction time is 3h)

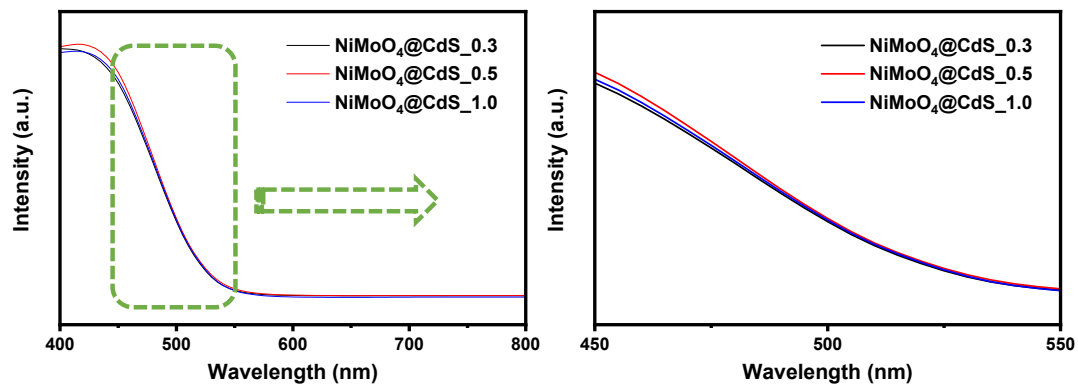

**Fig. S2.** UV-vis DRS of NiMoO<sub>4</sub>@CdS<sub>X</sub>, where X referred to the mass percent of NiMoO<sub>4</sub> in the composite.

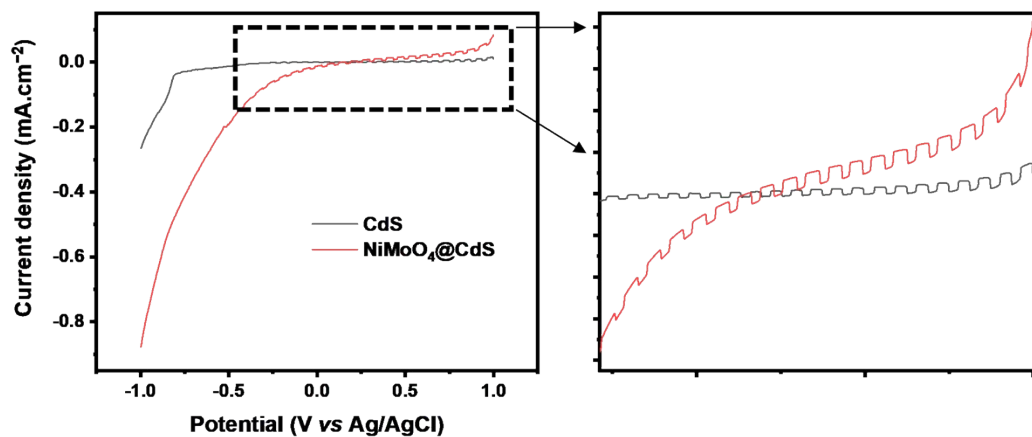

Fig. S3. Photocurrent responses of CdS, and NiMoO<sub>4</sub>@CdS electrodes by using LSV.

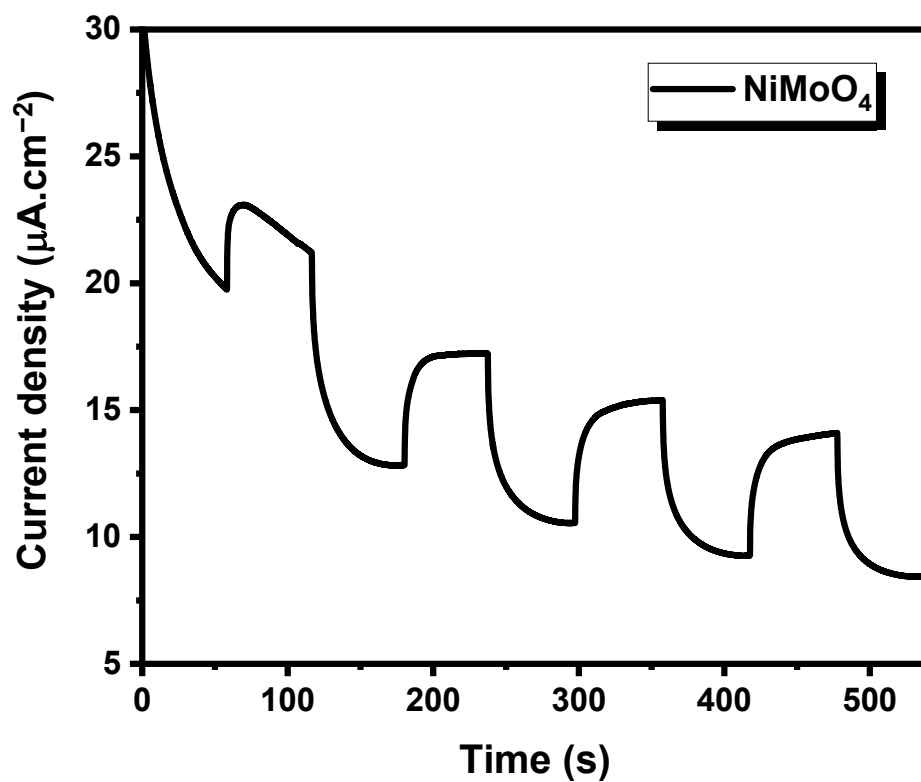

Fig. S4. Photocurrent response of NiMoO<sub>4</sub> photoelectrode by using CAM.
